# Supplementary material
Source: publisher figshare collection journal article supplement (https://plos.figshare.com/articles/dataset/_/5486431)
Supplement: Supplementary file [file 1]

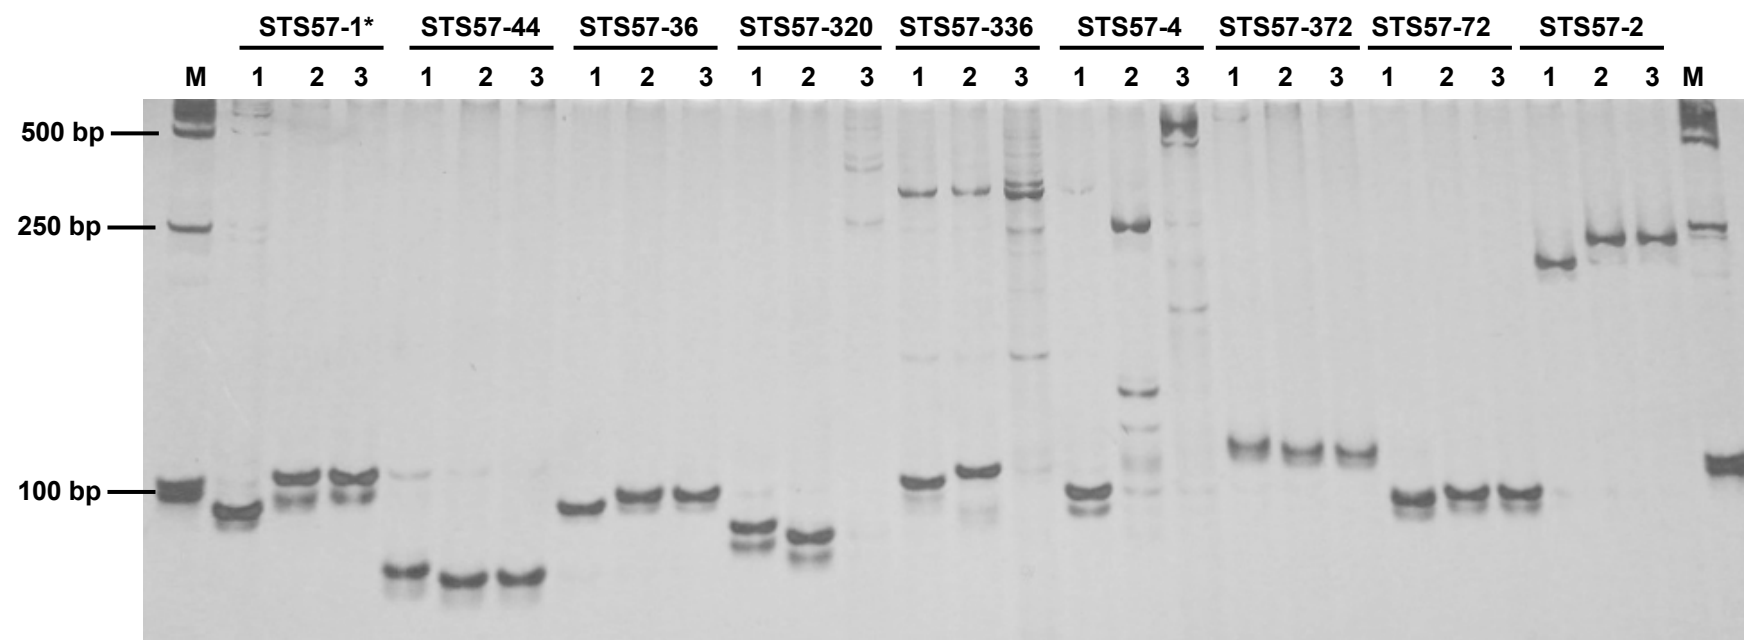

**S1 Fig. Polymorphic analysis of resistance donor IL-E1454, and susceptible parents RD23 and LTH with STS markers developed in this study**

M: DNA marker, DL2000; \*: STS marker; 1=IL-E1454; 2=RD23; 3=LTH. No target PCR fragments were amplified in STS57-320 and STS57-336 loci with LTH genomic DNA as template.
